# Supplementary material for: How robot-assisted gait training affects gait ability, balance and kinematic parameters after stroke: a systematic review and meta-analysis
Source: PubMed Central journal article supplement — Eur J Phys Rehabil Med. 2024 Apr 22;60(3):400–11. doi: 10.23736/S1973-9087.24.08354-0 (PMC11261306; doi:10.23736/s1973-9087.24.08354-0), 2024-04-22
Supplement: Supplementary_Digital_Material1.pdf [file Supplementary_Digital_Material1.pdf]

## SUPPLEMENTARY DIGITAL MATERIAL 1

### 1. Search Strategy for PubMed

((((((((((((((stroke\*[MeSH Terms]) OR ("cerebral apoplexy"[Title/Abstract])) OR ("cerebrovascular accident\*" [Title/Abstract])) OR (apoplexy[MeSH Terms])) OR ("cerebral stroke"[Title/Abstract])) OR ("ischemic stroke"[Title/Abstract])) OR ("cerebrovascular disease"[Title/Abstract])) OR (CVA\*[Title/Abstract])) OR ("Brain Vascular Accident\*" [Title/Abstract])) OR ("Acute Cerebrovascular Accident\*" [Title/Abstract])) OR ("cerebral hemorrhage"[Title/Abstract])) OR ("cerebral infarction"[Title/Abstract])) OR ("brain infarction"[Title/Abstract])) AND (((((((((((("Exoskeleton device"[MeSH Terms]) OR (Robotics[MeSH Terms])) OR (exoskelet\*[Title/Abstract])) OR (End-effector\*[Title/Abstract])) OR (robot\*[Title/Abstract])) OR (Lokomat[Title/Abstract])) OR (G-EO system[Title/Abstract])) OR (RAGT[Title/Abstract])) OR ("lower limb rehabilitation robot"[Title/Abstract])) OR ("gait training"[Title/Abstract])) OR (Gait-trainer\*[Title/Abstract])) OR ("lower limb robot"[Title/Abstract])) OR ("rehabilitation robot"[Title/Abstract])) OR ("rehabilitative robot"[Title/Abstract])) AND (((((((((((((((((((((((((((("gait parameter\*" [Title/Abstract]) OR ("pace parameter\*" [Title/Abstract])) OR ("Gait analys\*" [Title/Abstract])) OR (gait[MeSH Terms])) OR (movement[MeSH Terms])) OR (movement[Title/Abstract])) OR ("postural balance"[Title/Abstract])) OR (postural balance[MeSH Terms])) OR (walking[MeSH Terms])) OR (ambulation[Title/Abstract])) OR (walk\*[Title/Abstract])) OR (deambulation[Title/Abstract])) OR (temporal-spatial[Title/Abstract])) OR (time-space[Title/Abstract])) OR (spatial-temporal[Title/Abstract])) OR (time[Title/Abstract])) OR (temporal[Title/Abstract])) OR (spatial[Title/Abstract])) OR (space[Title/Abstract])) OR (geospatial[Title/Abstract])) OR (kinematic\*[Title/Abstract])) OR (kinematics[Title/Abstract])) OR

("dynamic parameter"[Title/Abstract])) OR ("Motion analys\*"[Title/Abstract])) OR (2-D[Title/Abstract])) OR (3-D[Title/Abstract])) OR ("Three dimensional"[Title/Abstract])) OR ("Two dimensional"[Title/Abstract])) OR (Force[Title/Abstract])) OR (kinetic\*[Title/Abstract])) OR (dynamic\*[Title/Abstract])) OR (dissymmetry\*[Title/Abstract])) OR ("Biomechanical phenomena"[Title/Abstract])) OR ("Biomechanical phenomena"[MeSH Terms])) OR ("gait analysis"[MeSH Terms])) OR (gait analysis[Title/Abstract]))

## 2. Search Strategy for Embase

| Order | Search terms                                                                   |
|-------|--------------------------------------------------------------------------------|
| #1    | 'stroke'/exp                                                                   |
| #2    | 'cerebral apoplexy':ti,ab,kw                                                   |
| #3    | 'cerebrovascular accident*':ti,ab,kw                                           |
| #4    | 'apoplexy'/exp                                                                 |
| #5    | 'cerebral stroke':ti,ab,kw                                                     |
| #6    | 'ischemic stroke':ti,ab,kw                                                     |
| #7    | 'cerebrovascular disease':ti,ab,kw                                             |
| #8    | cva*:ti,ab,kw                                                                  |
| #9    | 'brain vascular accident*':ti,ab,kw                                            |
| #10   | 'acute cerebrovascular accident*':ti,ab,kw                                     |
| #11   | 'cerebral hemorrhage':ti,ab,kw                                                 |
| #12   | 'cerebral infarction':ti,ab,kw                                                 |
| #13   | 'brain infarction':ti,ab,kw                                                    |
| #14   | #1 OR #2 OR #3 OR #4 OR #5 OR #6 OR #7 OR #8 OR #9 OR #10 OR #11 OR #12 OR #13 |
| #15   | 'exoskeleton device'/exp                                                       |
| #16   | 'robotics'/exp                                                                 |
| #17   | 'exoskelet*':ti,ab,kw                                                          |
| #18   | 'end-effector*':ti,ab,kw                                                       |
| #19   | 'robot*':ti,ab,kw                                                              |
| #20   | 'lokomat':ti,ab,kw                                                             |
| #21   | 'g-eo system':ti,ab,kw                                                         |
| #22   | 'ragt':ti,ab,kw                                                                |
| #23   | 'lower limb rehabilitation robot':ti,ab,kw                                     |

|     |                                                                                                       |
|-----|-------------------------------------------------------------------------------------------------------|
| #24 | 'gait training':ti,ab,kw                                                                              |
| #25 | 'gait-trainer*':ti,ab,kw                                                                              |
| #26 | 'lower limb robot':ti,ab,kw                                                                           |
| #27 | 'lower limb robot':ti,ab,kw                                                                           |
| #28 | 'rehabilitation robot':ti,ab,kw                                                                       |
| #29 | 'rehabilitative robot':ti,ab,kw                                                                       |
| #30 | #15 OR #16 OR #17 OR #18 OR #19 OR #20 OR #21 OR #22 OR #23 OR #24 OR #25 OR #26 OR #27 OR #28 OR #29 |
| #31 | 'gait parameter*':ti,ab,kw                                                                            |
| #32 | 'pace parameter*':ti,ab,kw                                                                            |
| #33 | 'gait analys*':ti,ab,kw                                                                               |
| #34 | 'gait'/exp                                                                                            |
| #35 | 'movement'/exp                                                                                        |
| #36 | 'movement':ti,ab,kw                                                                                   |
| #37 | 'postural balance':ti,ab,kw                                                                           |
| #38 | 'postural balance'/exp                                                                                |
| #39 | 'walking'/exp                                                                                         |
| #40 | 'ambulation':ti,ab,kw                                                                                 |
| #41 | 'walk*':ti,ab,kw                                                                                      |
| #42 | 'deambulation*':ti,ab,kw                                                                              |
| #43 | 'temporal-spatial':ti,ab,kw                                                                           |
| #44 | 'time-space':ti,ab,kw                                                                                 |
| #45 | 'spatial-temporal':ti,ab,kw                                                                           |
| #46 | 'time':ti,ab,kw                                                                                       |
| #47 | 'temporal':ti,ab,kw                                                                                   |
| #48 | 'spatial':ti,ab,kw                                                                                    |
| #49 | 'space':ti,ab,kw                                                                                      |
| #50 | 'geospatial':ti,ab,kw                                                                                 |
| #51 | 'kinematic*':ti,ab,kw                                                                                 |
| #52 | 'kinematics':ti,ab,kw                                                                                 |
| #53 | 'dynamic parameter':ti,ab,kw                                                                          |
| #54 | 'motion analys*':ti,ab,kw                                                                             |
| #55 | '2-d':ti,ab,kw                                                                                        |
| #56 | '3-d':ti,ab,kw                                                                                        |
| #57 | 'three dimensional':ti,ab,kw                                                                          |
| #58 | 'two dimensional':ti,ab,kw                                                                            |
| #59 | 'force':ti,ab,kw                                                                                      |
| #60 | 'kinetic*':ti,ab,kw                                                                                   |
| #61 | 'dynamic*':ti,ab,kw                                                                                   |
| #62 | 'dissymmetry*':ti,ab,kw                                                                               |
| #63 | 'biomechanical phenomena':ti,ab,kw                                                                    |
| #64 | 'biomechanical phenomena'/exp                                                                         |

|     |                                                                                                                                                                                                                                                          |
|-----|----------------------------------------------------------------------------------------------------------------------------------------------------------------------------------------------------------------------------------------------------------|
| #65 | 'gait analysis'/exp                                                                                                                                                                                                                                      |
| #66 | 'gait analysis':ti,ab,kw                                                                                                                                                                                                                                 |
| #67 | #31 OR #32 OR #33 OR #34 OR #35 OR #36 OR #37 OR #38 OR #39 OR #40 OR #41 OR #42 OR #43 OR #44 OR #45 OR #46 OR #47 OR #48 OR #49 OR #50 OR #51 OR #52 OR #53 OR #54 OR #55 OR #56 OR #57 OR #58 OR #59 OR #60 OR #61 OR #62 OR #63 OR #64 OR #65 OR #66 |
| #68 | #14 AND #30 AND #67                                                                                                                                                                                                                                      |

### 3. Search Strategy for Cochrane Library

| Order | Search terms                                                  |
|-------|---------------------------------------------------------------|
| #1    | MeSH descriptor:[Stroke]explode all trees                     |
| #2    | ("cerebral apoplexy"):ti,ab,kw                                |
| #3    | ("cerebrovascular accident"):ti,ab,kw                         |
| #4    | ("cerebral stroke"):ti,ab,kw                                  |
| #5    | ("ischemic stroke"):ti,ab,kw                                  |
| #6    | ("cerebrovascular disease"):ti,ab,kw                          |
| #7    | (CVA*):ti,ab,kw                                               |
| #8    | ("Brain Vascular Accident"):ti,ab,kw                          |
| #9    | ("Acute Cerebrovascular Accident"):i,ab,kw                    |
| #10   | ("cerebral hemorrhage"):ti,ab,kw                              |
| #11   | ("cerebral infarction"):ti,ab,kw                              |
| #12   | ("brain infarction"):ti,ab,kw                                 |
| #13   | #1 or#2 or#3 or#4 or#5 or#6 or#7 or#8 or#9 or#10 or #11 or#12 |
| #14   | MeSH descriptor:[Exoskeleton Device]explode all trees         |
| #15   | MeSH descriptor:[Robotics]explode all trees                   |
| #16   | (exoskelet*):ti,ab,kw                                         |
| #17   | (End-effector*):ti,ab,kw                                      |
| #18   | (robot*):ti,ab,kw                                             |
| #19   | (Lokomat):ti,ab,kw                                            |
| #20   | (G-EO system):ti,ab,kw                                        |
| #21   | (RAGT):ti,ab,kw                                               |
| #22   | ("lower limb rehabilitation robot"):ti,ab,kw                  |
| #23   | ("gait training"):ti,ab,kw                                    |
| #24   | (Gait-trainer*):ti,ab,kw                                      |

|     |                                                                                    |
|-----|------------------------------------------------------------------------------------|
| #25 | ("lower limb robot"):ti,ab,kw                                                      |
| #26 | ("rehabilitation robot"):ti,ab,kw                                                  |
| #27 | ("rehabilitative robot"):ti,ab,kw                                                  |
| #28 | #14 or #15 or#16 or#17 or#18 or#19 or#20 or#21 or#22 or#23 or#24 or#25 or#26 or#27 |
| #29 | ("gait parameter"):ti,ab,kw                                                        |
| #30 | ("pace parameter"):ti,ab,kw                                                        |
| #31 | ("Gait analysis"):ti,ab,kw                                                         |
| #32 | MeSH descriptor:[Gait]explode all trees                                            |
| #33 | MeSH descriptor:[Movement]explode all trees                                        |
| #34 | (movement):ti,ab,kw                                                                |
| #35 | ("postural balance"):ti,ab,kw                                                      |
| #36 | MeSH descriptor:[Postural Balance]explode all trees                                |
| #37 | MeSH descriptor:[Walking]explode all trees                                         |
| #38 | (ambulation):ti,ab,kw                                                              |
| #39 | (walk*):ti,ab,kw                                                                   |
| #40 | (deambulation):ti,ab,kw                                                            |
| #41 | (temporal-spatial):ti,ab,kw                                                        |
| #42 | (time-space):ti,ab,kw                                                              |
| #43 | (spatial-temporal):ti,ab,kw                                                        |
| #44 | (time):ti,ab,kw                                                                    |
| #45 | (temporal):ti,ab,kw                                                                |
| #46 | (spatial):ti,ab,kw                                                                 |
| #47 | (space):ti,ab,kw                                                                   |
| #48 | (geospatial):ti,ab,kw                                                              |
| #49 | (kinematic*):ti,ab,kw                                                              |
| #50 | (kinematics):ti,ab,kw                                                              |
| #51 | dynamic parameter):ti,ab,kw                                                        |
| #52 | Motion analysis):ti,ab,kw                                                          |
| #53 | ("2-D"):ti,ab,kw                                                                   |
| #54 | ( "3-D"):ti,ab,kw                                                                  |
| #55 | ("Three dimensional"):ti,ab,kw                                                     |
| #56 | ("Two dimensional"):ti,ab,kw                                                       |
| #57 | (Force):ti,ab,kw                                                                   |
| #58 | (kinetic*):ti,ab,kw                                                                |
| #59 | (dynamic"):ti,ab,kw                                                                |
| #60 | (dissymmetry*):ti,ab,kw                                                            |
| #61 | ("Biomechanical phenomena"):ti,ab,kw                                               |
| #62 | MeSH descriptor:[Biomechanical Phenomena]explode all trees                         |
| #63 | MeSH descriptor:[Gait Analysis]explode all trees                                   |

|     |                                                                                                                                                                                                                   |
|-----|-------------------------------------------------------------------------------------------------------------------------------------------------------------------------------------------------------------------|
| #64 | #29 or#30 or#31 or#32 or#33 or#34 or#35 or#36 or#37 or#38 or#39 or#40 or#41 or#42 or#43 or#44 or#45 or#46 or#47 or#48 or#49 or#50 or #51 or#52 or#53 or#54 or#55 or#56 or#57 or #58 or#59 or#60 or#61 or#62 or#63 |
| #65 | #13 and #28 and #64                                                                                                                                                                                               |
