# Supplementary material for: How robot-assisted gait training affects gait ability, balance and kinematic parameters after stroke: a systematic review and meta-analysis
Source: PubMed Central journal article supplement — Eur J Phys Rehabil Med. 2024 Apr 22;60(3):400–11. doi: 10.23736/S1973-9087.24.08354-0 (PMC11261306; doi:10.23736/s1973-9087.24.08354-0), 2024-04-22
Supplement: Supplementary_Digital_Material2.pdf [file Supplementary_Digital_Material2.pdf]

SUPPLEMENTARY DIGITAL MATERIAL 2

Supplementary Table I.—Descriptive analysis of the included clinical studies.

| Author (Year)                  | Basic information |            |             |             |                          |                   |            |      |                            |       | Intervention                                                                                                              |                                                                   |                         | Country   |
|--------------------------------|-------------------|------------|-------------|-------------|--------------------------|-------------------|------------|------|----------------------------|-------|---------------------------------------------------------------------------------------------------------------------------|-------------------------------------------------------------------|-------------------------|-----------|
|                                | n(male/female)    |            | Age         |             | Time since stroke (days) |                   | Type (I/H) |      | Affected side (left/right) |       | Device/Treatment (intensity)                                                                                              |                                                                   | Robot training type     |           |
|                                | EG                | CG         | EG          | CG          | EG                       | CG                | EG         | CG   | EG                         | CG    | EG                                                                                                                        | CG                                                                |                         |           |
| Alingh, Jf (2021)              | 13                | 13         | 60.6±9.3    | 56.8±9.8    | 5.4±1.8 weeks            | 5.9±2.1 weeks     | /          | /    | /                          | /     | AANmDOF robotic gait training (30 min/d, 3 d/week, 6weeks) .<br>Conventional gait training (30 min/d, 1-2 d/week, 6weeks) | Conventional gait training (30 min/d, 3-5 d/week, 6weeks)         | 0-RAGT with BWS         | Holland   |
| Amy Wright (2020)              | 16 (14/2)         | 15         | 59.6±10.1   | 65.1±10.1   | 31±19 months             | 32±21 months      | 15/1       | /    | 11/5                       | /     | AlterG Bionic Leg orthoses (≥30 min/d, 10weeks)                                                                           | Physical activity (30 min/d, 10weeks)                             | 0-RAGT                  | UK        |
| Britta Husemann (2007)         | 16 (11/5)         | 14 (10/4)  | 60±13       | 57±11       | 79±56                    | 89±61             | 12/4       | 10/4 | 4/12                       | 3/11  | Lokomat (30 min/d, 5 d/week, 4weeks) .<br>Conventional physiotherapy (30 min/d, 5 d/week, 4weeks)                         | Conventional physiotherapy (1 h, 5 d/week, 4weeks)                | T-RAGT with BWS         | Germany   |
| Dae-Hyouk Bang (2016)          | 9 (5/4)           | 9 (4/5)    | 53.56±3.94  | 53.67±2.83  | 11.56±2.60 months        | 12.56±2.65 months | 7/2        | 6/3  | 4/5                        | 4/5   | Lokomat (1 h, 5 d/week, 4weeks)                                                                                           | Treadmill gait training (1 h, 5 d/week, 4weeks)                   | T-RAGT with BWS         | Korea     |
| Daichi Miyagawa (2023)         | 17                | 18         | 65.1±12.9   | 63.0±12.9   | /                        | /                 | /          | /    | /                          | /     | “curara® type 4” robot (30 min/d, 5 d/week, 10 times)                                                                     | Conventional gait training (30 min/d, 5 d/week, 10 times)         | 0-RAGT                  | Japan     |
| Deng Yu (2021)                 | 27 (18/9)         | 27 (12/15) | 57.89±10.08 | 52.11±5.49  | 7.00±2weeks              | 7.89±2 weeks      | 15/12      | 18/9 | 12/15                      | 18/9  | Gait Training and Evaluation System A3 (100 min/d, 14 times)                                                              | Conventional gait training (100 min/d, 14 times)                  | T-RAGT with BWS         | China     |
| Dennis R. Louie (2021)         | 18                | 16         | 59.6±15.8   | 55.3±10.6   | 36.7±19.0                | 40.9±19.8         | /          | /    | /                          | /     | Exoskeleton (1 h, 3 d/week, 8weeks)                                                                                       | Physical therapy (1 h, 3 d/week, 8weeks)                          | 0-RAGT                  | Canada    |
| Dong-Xia Li (2021)             | 17 (15/2)         | 15 (14/1)  | 50.53±12.26 | 50.13±9.49  | 2.53±1.33 months         | 3.38±1.19 months  | /          | /    | 5/12                       | 9/6   | BEAR-HI assisted gait training (20 min/d, 5 d/week, 4 weeks)                                                              | Conventional training (20 min/d, 5 d/week, 4 weeks)               | 0-RAGT                  | China     |
| Guilin Meng (2022)             | 62 (33/29)        | 61 (35/26) | 59.36±1.65  | 60.12±1.73  | /                        | /                 | /          | /    | 28/34                      | 30/31 | Walkbot robotic gym (45 min/d, 3 d/week, 4 weeks)                                                                         | Conventional rehabilitation therapy (45 min/d, 3 d/week, 4 weeks) | T-RAGT with BWS         | China     |
| Hiroki Watanabe (2014)         | 11 (7/4)          | 11 (4/7)   | 67.0±16.8   | 75.6±13.9   | 58.9±46.5                | 50.6±33.8         | 6/5        | 6/5  | 5/6                        | 6/5   | HAL (20 min/d, 3 d/week, 4 weeks)                                                                                         | Conventional gait training (20 min/d, 3 d/week, 4 weeks)          | 0-RAGT                  | Japan     |
| Hiroki Watanabe (2016)         | 12                | 12         | /           | /           | 57.0±44.3                | 48.1±33.3         | /          | /    | /                          | /     | HAL (20 min/d, 3 d/week, 5 weeks)                                                                                         | Conventional gait training (20 min/d, 3 d/week, 4 weeks)          | 0-RAGT                  | Japan     |
| Huihuang Zhang (2023)          | 18 (14/4)         | 16 (13/3)  | 56.88±10.99 | 60.81±9.61  | 2.50±4.00 months         | 3.50±3.00 months  | /          | /    | 11/7                       | 8/8   | Lower extremity rehabilitation robot (30 min/d, 5 d/week, 4 weeks)                                                        | Conventional gait training (30 min/d, 5 d/week, 4 weeks)          | T-RAGT with BWS         | China     |
| Hwang-Jae Lee (2019)           | 14 (7/7)          | 12 (7/5)   | 61.85±7.87  | 62.25±6.36  | 1486±264.12              | 1536±311.54       | 10/4       | 8/4  | 9/5                        | 6/6   | the Gait Enhancing and Motivating System (45 min/d, 3 d/week, 4 weeks)                                                    | Conventional gait training (45 min/d, 3 d/week, 4 weeks)          | 0-RAGT                  | Korea     |
| Hyun-Joon Yoo (2023)           | 10                | 10         | 61 (43-85)  | 65 (43-87)  | 19 (10-30)               | 43 (11-119)       | /          | /    | /                          | /     | ExoAtlet Medy (30 min/d, 3 d/week, 4 weeks)                                                                               | Conventional gait training (30 min/d, 3 d/week, 4 weeks)          | 0-RAGT                  | Korea     |
| Irene Aprilea (2019)           | 14 (10/4)         | 12 (9/3)   | 56.43±12.93 | 61.58±9.00  | 44.92±16.02              | 86.58±52.84       | 11/3       | 8/4  | 5/9                        | 9/3   | G-E0 system (45 min/d, 3 d/week, 20 times)                                                                                | Conventional gait training (3 d/week, 20 times)                   | 0-RAGT with BWS         | Italy     |
| Joseph Hidler (2009)           | 33 (21/12)        | 30 (18/12) | 59.9±11.3   | 54.6±9.4    | 110.9±62.5               | 138.9±60.9        | 26/7       | 21/9 | 22/11                      | 13/17 | Lokomat (45 min/d, 3 d/week, 24 times)                                                                                    | Conventional gait training (45 min/d, 3 d/week, 24 times)         | T-RAGT with BWS         | USA       |
| Joyce Chua (2015)              | 53 (35/18)        | 53 (40/13) | 62.1±10.3   | 60.7±10.7   | 27.2±11.3                | 29.8±14.1         | /          | /    | 29/24                      | 32/21 | Electromechanical gait trainers (45 min/d, 6 d/week, 8 weeks)                                                             | Conventional gait training (45 min/d, 6 d/week, 8 weeks)          | RAGT                    | Singapore |
| Kelly P Westlake (2009)        | 8 (6/2)           | 8 (7/1)    | 58.6±16.9   | 55.1±13.6   | 43.8±26.8 months         | 36.8±20.3 months  | 3/5        | 5/3  | 4/4                        | 5/3   | Lokomat (30 min/d, 3 d/week, 4 weeks)                                                                                     | Treadmill training with BWS (30 min/d, 3 d/week, 4 weeks)         | T-RAGT with BWS         | USA       |
| Michael D. Lewek (2015)        | 9                 | 8          | 52±12       | 53±6        | 45±56 months             | 65±68 months      | /          | /    | /                          | /     | Lokomat (1 h/d, 3 d/week, 4 weeks)                                                                                        | Physical therapy (1 h/d, 3 d/week, 4 weeks)                       | T-RAGT with BWS         | USA       |
| Michiel P. M. van Nunen (2014) | 16 (10/6)         | 14         | 50.0±9.6    | 56.0±8.7    | 61.6±28.7                | 67.1±49.1         | 9/7        | 10/4 | 11/5                       | 9/5   | Lokomat (1 h/d, 2 d/week, 8 weeks) .<br>Conventional overground therapy (30 min/d, 3 d/week, 8 weeks)                     | Conventional overground therapy (3.5/week, 8 weeks)               | T-RAGT with BWS         | Holland   |
| M Pohl (2007)                  | 72                | 72         | 62.3±12.0   | 64.0±11.6   | 4.2±1.8 weeks            | 4.5±1.9 weeks     | /          | /    | /                          | /     | Gait trainer (20 min/d, 5 d/week, 4 weeks) .<br>Physiotherapy (25 min/d, 5 d/week, 4 weeks)                               | Physiotherapy (45 min/d, 5 d/week, 4 weeks)                       | T-RAGT with BWS         | German    |
| Naoki Tanaka (2022)            | 13 (7/6)          | 8 (6/2)    | 67.77±9.36  | 66.00±13.56 | 29.46±18.78              | 33.75±19.70       | 9/4        | 5/3  | 9/4                        | 6/2   | GaitMaster 6 (20 min/d, 5 d/week, 4 weeks)                                                                                | Conventional gait training (20 min/d, 5 d/week, 4 weeks)          | 0-RAGT with BWS         | Japan     |
| Nataša Bizovičar (2016)        | 9 (4/5)           | 10 (7/3)   | 52±8        | 60±10       | 88±53                    | 121±130           | 2/7        | /    | 7/2                        | 6/4   | E-go (45 min/d, 3 weeks)                                                                                                  | Physiotherapy training (45 min/d, 3 weeks)                        | 0-RAGT                  | Slovenia  |
| Rustem Mustafaoglu (2020)      | 17 (11/6)         | 17 (12/5)  | 53.8±10.7   | 55.3±11.2   | 12 (7-28) months         | 13 (4-30) months  | 9/8        | 8/9  | 9/8                        | 12/5  | Lokomat (45 min/d, 2 non-consecutive d/week, 6 weeks)                                                                     | Conventional training (45 min/d, 5 d/week, 6 weeks)               | T-RAGT with BWS         | Turkey    |
| Sanaz Pournajaf (2023)         | 61 (36/25)        | 28 (18/10) | 59±15       | 63.39±12.85 | 48±44                    | 58.46±43.24       | 53/8       | 26/2 | 33/28                      | 18/10 | G-E0 System/ Lokomat Pro (30 min/d, 3-5 d/week, 4 weeks)                                                                  | Conventional gait training (30 min/d, 3-5 d/week, 4 weeks)        | 0-RAGT /T-RAGT with BWS | Italy     |
| Naojiro Tanaka (2018)          | 21 (13/8)         | 20 (14/6)  | 64.9±12.2   | 62.3±9.3    | 103.9±28.1               | 92.9±35.9         | 18/3       | 11/9 | 8/13                       | 10/10 | SMA,Conventional training (1-2 h/d, within 20 min SMA, 10days)                                                            | Conventional training (1-2 h/d, 10days)                           | 0-RAGT                  | Japan     |
| Yeon Gyo Nam (2022)            | 21                | 31         | 60.63±15.61 | 62.42±15.04 | 767.17±1435.78           | 522.40±1220.70    | /          | /    | /                          | /     | EXOWALK (30 min/d, 5 d/week, 4 weeks)                                                                                     | conventional gait treatment (30 min/d, 5 d/week, 4 weeks)         | 0-RAGT                  | Korea     |
